# Supplementary material
Source: MDPI journal article supplement (https://www.mdpi.com/1424-2818/12/3/117)
Supplement: s1 [file s1]

**Table S1.** Identification key with the anatomical and reproductive features characterizing the genera and species found the study areas.

|                                                                                                                                        |                                                        |
|----------------------------------------------------------------------------------------------------------------------------------------|--------------------------------------------------------|
| 1. Sporangial compartments                                                                                                             | <b>Sporolithales</b>                                   |
| 1. Multiporate sporangial conceptacles                                                                                                 | <b>Hapalidiales</b>                                    |
| 1. Uniporate sporangial conceptacles                                                                                                   | <b>Corallinales</b>                                    |
| <b>Sporolithales</b>                                                                                                                   |                                                        |
| 1. Few sporangial cavities per sori                                                                                                    | 2                                                      |
| 2. Sporangial compartments < 70 µm in height                                                                                           | 3                                                      |
| 3. Ovoid sporangial cavities in section; 30-40 in diameter (D), 50-70 µm in height (H)                                                 | <i>Sporolithon liberum</i> (Lemoine) Aguirre and Braga |
| 2. Sporangial compartments > 70 µm in height                                                                                           | 4                                                      |
| 4. Ovoid sporangial cavities in section; D = 40-50 µm, H = 70-75 µm                                                                    | <i>Sporolithon</i> cf. <i>oulanovi</i> Pfender         |
| 4. Large sporangial cavities in nemathecium-like protruding sori; sporangial cavities circular in section; D = 120-170, H = 130-170 µm | <i>Sporolithon</i> sp.#                                |
| 1. Numerous sporangial cavities per sori                                                                                               | 3                                                      |
| 3. Sporangial cavities rectangular in section and narrow; D = 40-50 µm, H = 70-90 µm                                                   | <i>Sporolithon lugeonii</i> (Pfender) Ghosh and Maithy |
| 3. Sporangial cavities ovoidal-rectangular in section; D = 60-70 µm, H = 100-120 µm                                                    | <i>Sporolithon nummuliticum</i> (Gümbel) Moussavian    |
| <b>Hapalidiales</b>                                                                                                                    |                                                        |
| 1. Thallus dimerous                                                                                                                    | <i>Melobesia</i> sp.                                   |
| 1. Thallus monomerous                                                                                                                  | 2                                                      |
| 2. Plumose ventral core                                                                                                                | 3                                                      |
| 3. Thin encrusting thalli                                                                                                              | 4                                                      |
| 4. Groups of protrudent sporangial conceptacles piled up in warts                                                                      | 5                                                      |
| 5. Rectangular-ovoidal conceptacles in section < 200 µm in diameter                                                                    | <i>Lithothamnion</i> sp. 1‡                            |
| 5. Lenticular (planar bottom and high arched roof) conceptacles in section > 200 µm in diameter                                        | <i>Lithothamnion</i> sp. 2                             |
| 4. Protrudent sporangial conceptacles isolated in the thallus                                                                          | <i>Lithothamnion</i> sp. 3                             |
| 3. Warty to fruticose thalli                                                                                                           | 6                                                      |
| 6. Regularly zonate thallus                                                                                                            | 7                                                      |
| 7. Protrudent sporangial conceptacles < 200 µm in diameter                                                                             | <i>Lithothamnion</i> sp 4                              |
| 7. Slightly protrudent sporangial conceptacles > 200 µm in diameter                                                                    | 8                                                      |
| 8. Rectangular conceptacles in section                                                                                                 | <i>Lithothamnion camarasae</i> Pfender                 |
| 8. Flat elongated rectangular conceptacles in section                                                                                  | ' <i>Palaeothamnium</i> ' <i>kossovense</i> Maslov†    |
| 6. Irregularly zonate thallus                                                                                                          | 9                                                      |
| 9. Large rectangular-polygonal cells with no lateral alignment of cells in adjacent filaments; thick cell walls                        | <i>Lithothamnion corallinaeforme</i> Lemoine           |
| 9. Rectangular cells in the dorsal region with well lateral alignment of cells in adjacent filaments                                   | <i>Lithothamnion</i> sp 5                              |
| 2. Coaxial or nearly coaxial ventral core                                                                                              | 10                                                     |
| 10. Encrusting thalli, sporangial conceptacles ~200 µm in diameter                                                                     | <i>Mesophyllum</i> sp 1                                |
| 10. Fruticose thalli, sporangial conceptacles > 400 µm in diameter                                                                     | <i>Mesophyllum</i> sp 2                                |

---

## Corallinales

|                                                                                                                                 |                                                                        |   |
|---------------------------------------------------------------------------------------------------------------------------------|------------------------------------------------------------------------|---|
| 1. Geniculate thallus; medulla made up of large, polygonal cells                                                                | <i>Subterraniophyllum thomasi</i> Elliott                              |   |
| 1. Non-geniculate thallus                                                                                                       |                                                                        | 2 |
| 2. Thallus dimerous                                                                                                             |                                                                        | 3 |
| 2. Thallus monomerous                                                                                                           |                                                                        | 4 |
| 3. Large, rectangular ventral palisade-cell filaments                                                                           | <i>Lithoporella</i> sp.                                                |   |
| 3. Ventral layer of irregular cell filaments                                                                                    | <i>Karpathia sphaerocellulosa</i> Maslov                               |   |
| 3. Ventral layer of quadrangular cells                                                                                          | <i>Hydrolithon</i> cf. <i>lemoinei</i> (Miranda) Aguirre, Braga, Bassi |   |
| 3. Isobilateral organization of the ventral filaments                                                                           | <i>Distichoplax biserialis</i> Dietrich                                |   |
| 4. Plumose ventral core; absence of trichocytes                                                                                 |                                                                        | 5 |
| 5. Sporangial conceptacle triangular in section; long pore canal with straight, parallel walls                                  | <i>Spongites</i> sp. 1*                                                |   |
| 5. Lenticular sporangial conceptacles in section with short, conical pore canal                                                 | <i>Spongites</i> sp. 2**                                               |   |
| 5. Rectangular, box-like sporangial conceptacles in section with rounded corners; long pore canal with straight, parallel walls | <i>Spongites</i> sp. 3                                                 |   |
| 5. Large, trapezoidal sporangial conceptacles in section; long, pointing pore canal                                             | <i>Spongites</i> sp. 4§                                                |   |
| 4. Mostly coaxial ventral core; trichocytes arranged in vertical rows                                                           |                                                                        | 6 |
| 6. Kidney-shaped sporangial conceptacles in section; > 300 µm in diameter                                                       | <i>Neogoniolithon</i> sp. 1                                            |   |
| 6. Triangular sporangial conceptacles in section; < 300 µm in diameter                                                          | <i>Neogoniolithon</i> sp. 2                                            |   |

---

# The size of the sporangial cavities is similar to that of the Oligocene species *Sporolithon macrosporangicum* and the recent *S. episoredion*. Nonetheless, the arrangement of sporangial cavities in nemathecium-like structures and the general thallus morphology in *Sporolithon* sp. are different from *S. macrosporangicum* and *S. episoredion*.

‡ This species shows similar thallus organization and reproductive structures arranged in protuberant knobs as *Lithothamnion cymbicrustra*, but sporangial conceptacles are larger than those of the study material.

† The generitype *Palaeothamnium* was considered a younger heterotypic synonym of *Lithothamnion* and the type species *P. archaeotypum* was redescribed as *Lithothamnion archaeotypum*. Revision of the type material of *P. kossovense* showed that the species couldn't be reliably attributed to any genera of the Hapalidiales due to the lack of epithallial cells.

\* Anatomical features and reproductive structures of this species fit with the original description of the species ?*Lithophyllum perrandoi* or *Lithophyllum ippolitoi*. Cell fusions are clearly visible in the original figures of these two species; therefore, they cannot be assigned to the subfamily Lithophylloideae.

\*\* Anatomical features and reproductive structures of this species fit with the original description of *Lithophyllum kamptneri*. Cell fusions are clearly visible in the original figurations of this species; therefore, they cannot be assigned to the subfamily Lithophyloideae.

§ The shape and size of the sporangial conceptacles are similar to *Lithophyllum intumescens* Mastorilli. Nonetheless, the observed material is based on thallus fragments; therefore, comparison of anatomical characters is precluded. In the original description of the species, Mastorilli highlighted the presence of cell fusions in the ventral core: “*Peraltro, questo secondo caso si ritiene piuttosto la conseguenza dell’avventuna fusione degli elementi di due serie parallele, osservandosi qua e là ancora qualche traccia dei sretti orizzontali riparmiti in parte dal riassorbimento*”. Therefore, the species cannot be included within the subfamily Lithophylloideae.
